# Supplementary material for: Herba houttuyniae Extract Benefits Hyperlipidemic Mice via Activation of the AMPK/PGC-1α/Nrf2 Cascade
Source: PubMed Central journal article supplement (PMC7019422; doi:10.3390/nu12010164), 2020-01-07
Supplement: nutrients-12-00164-s001.pdf [file nutrients-12-00164-s001.pdf]

## Supplementary Materials

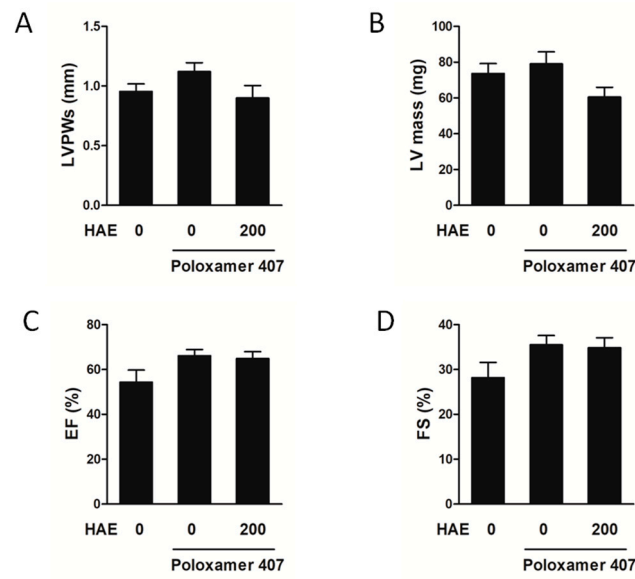

**Figure S1.** Quantitative analyses of mice LVPWs, LV mass, EF, and FS. (A) LVPWs. (B) LV mass. (C) EF. (D) FS. The values are the means  $\pm$  S.E.M. ( $n = 8$ ).

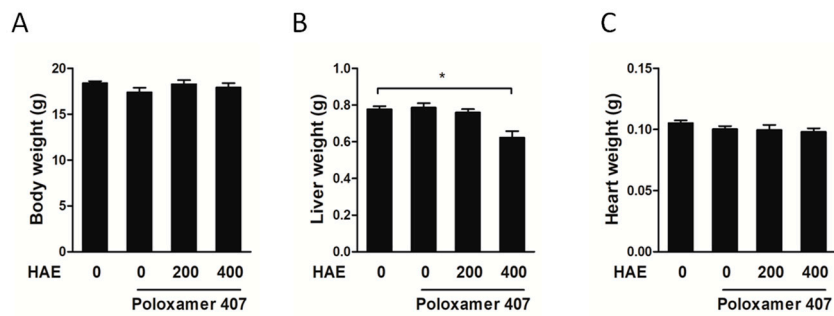

**Figure S2.** Mice body, liver, and heart weights. (A) Body weight. (B) Liver weight. (C) Heart weight. The values are the means  $\pm$  S.E.M. ( $n = 8$ ); \*  $p < 0.05$ .

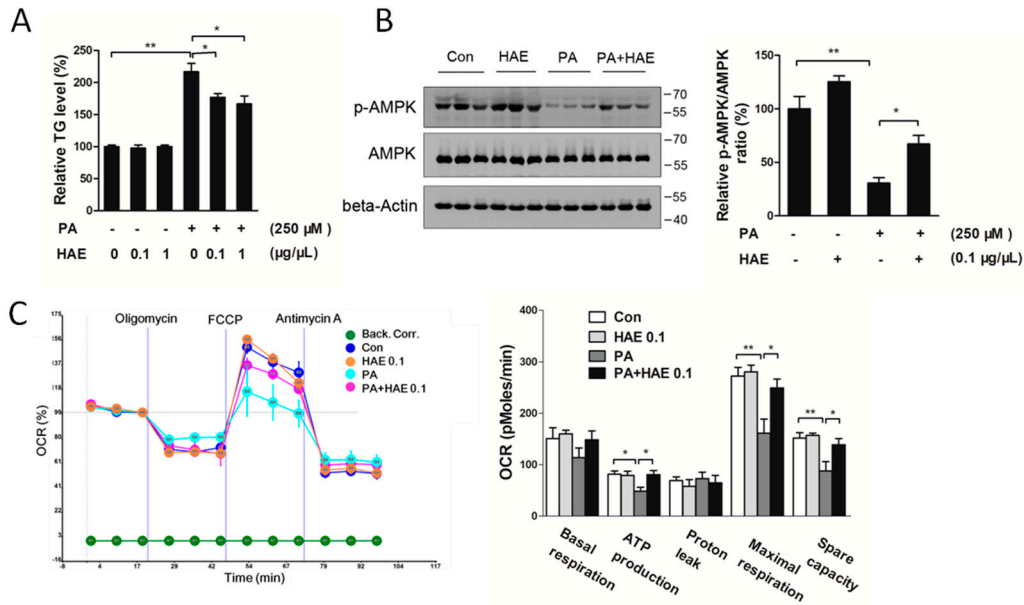

**Figure S3.** Protective effects of HAE on PA-induced HepG2 cells. HepG2 cells were pretreated with or without 0.1  $\mu$ g/ $\mu$ L or 1  $\mu$ g/ $\mu$ L of HAE for 24 h followed by 250  $\mu$ M of PA challenge for another 24 h. Con, control; HAE, HAE at 0.1  $\mu$ g/ $\mu$ L; PA, palmitic acid; PA + HAE, palmitic acid plus HAE at 0.1  $\mu$ g/ $\mu$ L. (A) TG content. (B) p-AMPK and AMPK protein expression (left, western blot image; right, statistical analysis). (C) Mitochondrial oxygen consumption rate (OCR) (left, OCR image; right, statistical analysis). The values are the means  $\pm$  S.E.M. ( $n = 3$ ); \*  $p < 0.05$ ; \*\*  $p < 0.01$ .

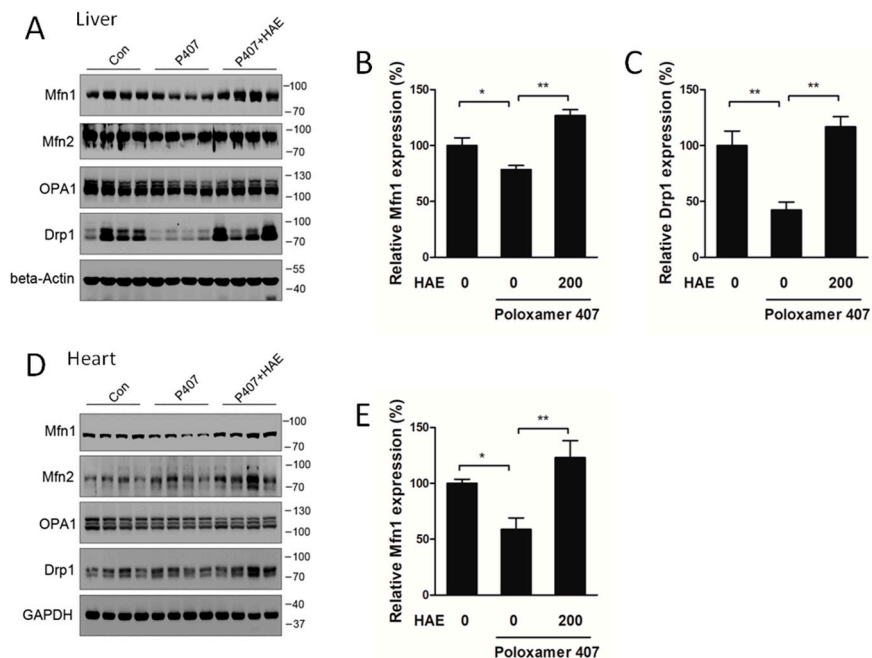

**Figure S4.** Mitochondrial dynamic-related protein expressions in the liver and heart. Con, control; P407, poloxamer 407; P407 + HAE, poloxamer 407 plus HAE at 200 mg/kg/day. The western blot image of (A) liver dynamic-related protein and (D) heart dynamic-related protein and the statistical analyses of (B) liver Mfn1 and (C) liver Drp1 contents and (E) heart Mfn1 content. The values are the means  $\pm$  S.E.M. ( $n = 8$ ); \*  $p < 0.05$ ; \*\*  $p < 0.01$ .

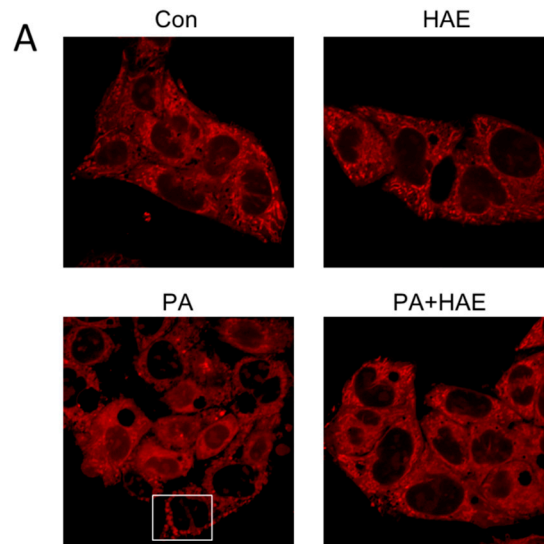

**Figure S5.** Mitochondrial morphology in palmitic acid (PA)-induced HepG2 cells with or without HAE pretreatment. HepG2 cells were pretreated with or without 0.1 µg/µL of HAE for 24 h followed by 250 µM of PA challenge for another 24 h. Then the cells were stained with Mito Tracker Red (Thermo) to mark mitochondrial morphology. (A) Confocal image of HepG2 cells. Con, control; HAE, HAE at 0.1 µg/µL; PA, palmitic acid; PA + HAE, palmitic acid plus HAE at 0.1 µg/µL.

**Table S1.** Primers.

| Species | Gene                         | Primer (5'-3')                   |
|---------|------------------------------|----------------------------------|
| Mouse   | <i>18S rRNA</i>              | Forward: GTAACCCGTTGAACCCCAT     |
|         |                              | Reverse: CCATCCAATCGGTAGTAGCG    |
| Mouse   | <i>ANP</i>                   | Forward: GATTTC AAGAACCTGCTAGACC |
|         |                              | Reverse: AGTTTGCTTTTCAAGAGGGC    |
| Mouse   | <i>BNP</i>                   | Forward: CACCCAAAAAGAGTCCTTCG    |
|         |                              | Reverse: CAACA ACTTCAGTGC GTTAC  |
| Mouse   | <i>ACTA1</i>                 | Forward: ACTGGGGACTAAATCCAAGTC   |
|         |                              | Reverse: CATACTACCATGACACCCTGG   |
| Mouse   | <i>D-loop</i><br>(for DNA)   | Forward: AGGCATGAAAGGACAGCA      |
|         |                              | Reverse: TTGGCATTAAAGAGGAGGG     |
| Mouse   | <i>18S rRNA</i><br>(for DNA) | Forward: GAGAAACGGCTACCATCC      |
|         |                              | Reverse: CACCAGACTTGCCCTCCA      |
